# Supplementary material for: Analysis of the Impact of Disease Acceptance, Demographic, and Clinical Variables on Adherence to Treatment Recommendations in Elderly Type 2 Diabetes Mellitus Patients
Source: MDPI journal article supplement (doi:10.3390/ijerph18168658), 2021-08-16
Supplement: s1 [file s1]

**Skala adherence w chorobach przewlekłych**  
**The Adherence in Chronic Diseases Scale (ACDS)**

**Autor: Aldona Kubica**

Poniżej zamieszczono zestaw 7 pytań wraz z odpowiedziami. Proszę ocenić, która z odpowiedzi najlepiej odzwierciedla Twoje zachowania, Twoją sytuację oraz Twoje poglądy. Proszę o udzielenie szczerych odpowiedzi poprzez zaznaczenie właściwej znakiem X.

- 
1. Czy zawsze pamiętasz o przyjmowaniu wszystkich leków zgodnie z zaleceniami lekarza?
    - A. Zawsze
    - B. Prawie zawsze
    - C. Czasami
    - D. Prawie nigdy
    - E. Nigdy
  2. Czy okresowo zmieniasz dawkowanie leków bez porozumienia ze swoim lekarzem?
    - A. Nigdy
    - B. Bardzo rzadko
    - C. Czasami
    - D. Często
    - E. Nie stosuję się wcale do zalecanego dawkowania
  3. Czy dostosowujesz przyjmowanie leków do swojego samopoczucia?
    - A. Stosuję wszystkie leki regularnie, niezależnie od samopoczucia,
    - B. Obniżam dawkę niektórych leków, gdy czuję się bardzo dobrze
    - C. Opuszczam dawki niektórych leków, gdy czuję się bardzo dobrze
    - D. Okresowo odstawiam niektóre leki, gdy czuję się bardzo dobrze
    - E. Zaprzeszuję przyjmowania wszystkich leków, gdy czuję się bardzo dobrze
  4. Gdy pojawiają się objawy uboczne związane z przyjmowaniem leków (np. bóle żołądka, bóle wątroby, wysypka, brak apetytu, obrzęki) wówczas
    - A. Natychmiast zgłaszam się do lekarza
    - B. Zmniejszam dawkę leku i staram się przyspieszyć planowaną wizytę u lekarza
    - C. Odstawiam lek i staram się przyspieszyć planowaną wizytę u lekarza
    - D. Odstawiam lek i czekam na planową wizytę u lekarza
    - E. Odstawiam wszystkie leki i czekam na planową wizytę u lekarza
  5. Czy uważasz, że wszystkie leki, które przyjmujesz są potrzebne dla zachowania dobrego stanu zdrowia?
    - A. Tak, uważam, że wszystkie leki pomagają mi utrzymać dobry stan zdrowia
    - B. Większość leków, które przyjmuję pomagają mi utrzymać dobry stan zdrowia
    - C. Tylko niektóre leki, które przyjmuję pomagają mi utrzymać dobry stan zdrowia
    - D. Niektóre zapisane leki mi pomagają, ale inne szkodzą
    - E. Większość leków stosowanych przez dłuższy czas szkodzi mojemu zdrowiu

6. Czy Twój lekarz pyta Cię o niedogodności związane z przyjmowaniem leków?
- A. Tak, za każdym razem
  - B. Tak, zazwyczaj
  - C. Czasami
  - D. Rzadko
  - E. Nigdy
7. Czy szczerze odpowiadasz na pytania lekarza dotyczące przyjmowania leków?
- A. Tak, zawsze
  - B. Prawie zawsze
  - C. Staram się być szczery, ale czasami trudno przyznać się, że nie przestrzegam zaleceń
  - D. Czasami tak, czasami nie
  - E. Nie, to moja prywatna sprawa
- 

Punktacja

- A – 4
- B – 3
- C – 2
- D – 1
- E – 0

SUMA UZYSKANYCH PUNKTÓW: .....

| Liczba punktów | Normy centylowe |
|----------------|-----------------|
| ≤20            | poziom niski    |
| 21-26          | poziom średni   |
| ≥27            | poziom wysoki   |

**Skala adherence w chorobach przewlekłych**  
**The Adherence in Chronic Diseases Scale (ACDS)**

**Autor: Aldona Kubica**

Minimalna liczba punktów: 0

Maksymalna liczba punktów: 28

**Interpretacja wyników:**

Wysoki adherence

Średni adherence

Niski adherence

**Założenie ACDS:** jedynie wysoki adherence wg. ACDS odzwierciedla dobrą realizację planu terapeutycznego w zakresie farmakoterapii.

**Opis i zastosowanie**

Skala adherence w chorobach przewlekłych zawiera 7 pytań wraz z proponowanymi zestawami 5 odpowiedzi do każdego pytania. Pytania odnoszą się do zachowań bezpośrednio determinujących adherence (pytania 1-5), oraz do sytuacji i poglądów, które mogą pośrednio wpływać na adherence (pytania 6-7).

Skala jest przeznaczona do badania osób dorosłych leczonych z powodu chorób przewlekłych. Narzędzie to ma nie tylko odzwierciedlać rzeczywistą realizację planu terapeutycznego w zakresie farmakoterapii, ale także wskazywać na mechanizmy determinujące adherence pacjentów.

Wyniki mogą być pomocne w podejmowaniu działań na rzecz poprawy regularności przyjmowania leków w praktyce klinicznej.
